# Supplementary material
Source: Springer Nature journal article supplement (https://www.springermedizin.de/resource/supplementary/12889_2009_2136_MOESM2_ESM.pdf/9484680)

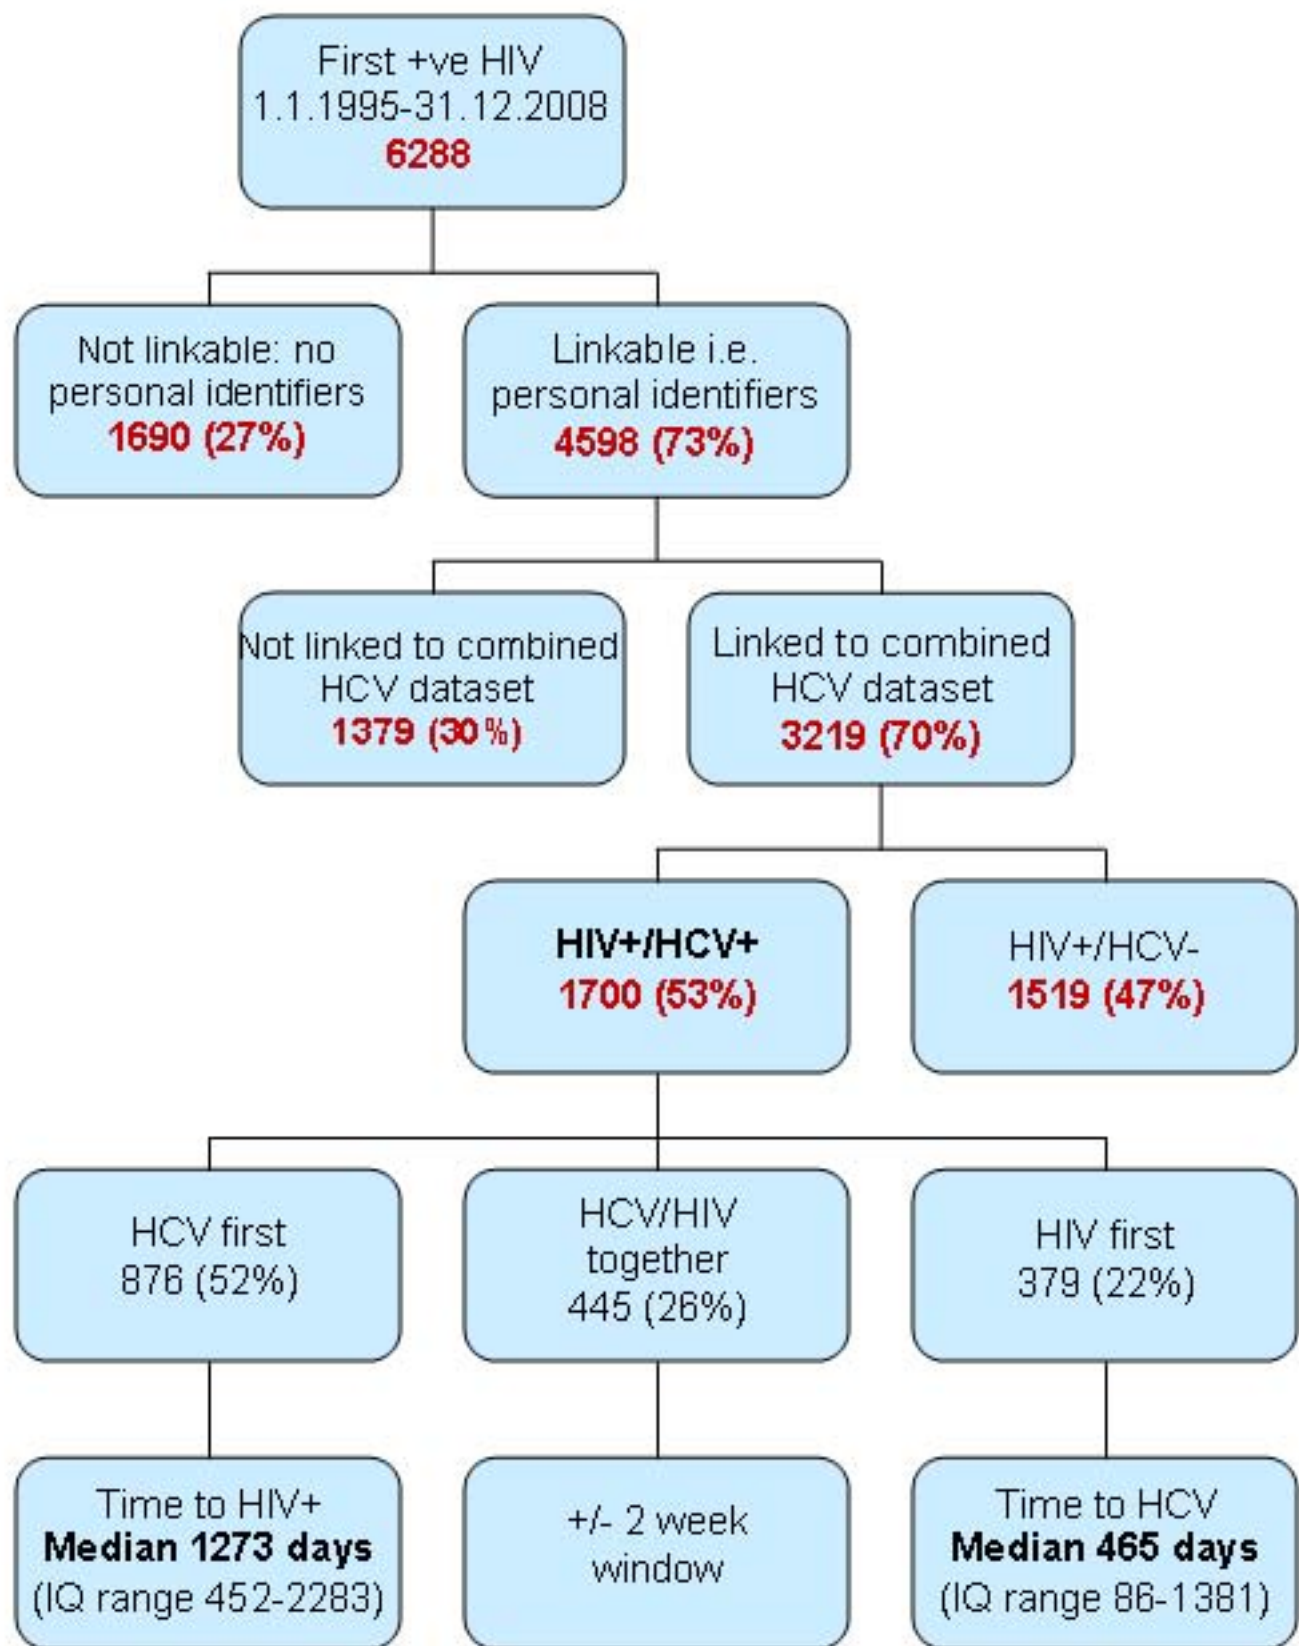

Supplement: MOESM2 [file 9484680]
